# Supplementary material for: Divergent humoral responses to 23-valent pneumococcal polysaccharide vaccine in critically-ill burn and neurosurgical patients
Source: PubMed Central journal article supplement (PMC5951595; doi:10.1371/journal.pone.0197037), 2018-05-14
Supplement: pone.0197037.s001.pdf [file pone.0197037.s001.pdf]

S1 Table. Dataset PPSV23 in Critically-ill

Table A: Clinical and IgG Concentrations

| De-identified subject | Group (Burn = 1, Neuro = 0) | Pre ST 1 | Pre ST 3 | Pre ST 4 | Pre ST 5 | Pre ST 8 | Pre ST 6B | Pre ST 9N | Pre ST 7F | Pre ST 12F | Pre ST 14 | Pre ST 19F | Pre ST 9V | Pre ST 23F | Pre ST 18C |
|-----------------------|-----------------------------|----------|----------|----------|----------|----------|-----------|-----------|-----------|------------|-----------|------------|-----------|------------|------------|
| 1                     | 1                           | 0.12     | 0.18     | 0.26     | 3.75     | 0.33     | 0.42      | 0.21      | 0.45      | 0.45       | 0.39      | 3.06       | 0.56      | 0.12       | 2.71       |
| 2                     | 1                           | 0.11     | 0.77     | 0.18     | 7.87     | 0.26     | 0.94      | 0.18      | 12.81     | 1.12       | 3.17      | 0.59       | 0.18      | 7.46       | 4.72       |
| 3                     | 1                           | 2.77     | 0.78     | 0.4      | 6.17     | 0.84     | 1.45      | 0.27      | 3.74      | 0.84       | 3.27      | 4.59       | 0.72      | 0.87       | 3.12       |
| 4                     | 1                           | 0.7      | 0.56     | 0.19     | 2.67     | 0.74     | 0.42      | 0.19      | 0.93      | 0.33       | 0.44      | 1.1        | 0.93      | 0.31       | 2.55       |
| 5                     | 1                           | 0.36     | 3.29     | 0.36     | 6.33     | 0.82     | 0.87      | 1.27      | 0.69      | 1.36       | 0.42      | 8.15       | 1.12      | 0.62       | 6.52       |
| 6                     | 1                           | 0.2      | 1.81     | 0.07     | 17.44    | 2.11     | 0.66      | 0.14      | 1.16      | 0.54       | 0.38      | 0.66       | 1.25      | 0.09       | 2.53       |
| 7                     | 1                           | 0.14     | 0.09     | 0.31     | 11.11    | 18.59    | 0.27      | 0.09      | 0.46      | 0.96       | 0.3       | 2.4        | 0.17      | 0.05       | 0.88       |
| 8                     | 1                           | 0.86     | 0.55     | 0.28     | 5.91     | 0.78     | 1.16      | 0.71      | 1.97      | 1.07       | 0.74      | 1.93       | 1.1       | 2.15       | 8.37       |
| 9                     | 1                           | 0.07     | 0.1      | 0.04     | 1.05     | 0.37     | 0.1       | 0.09      | 0.95      | 0.14       | 0.65      | 6.08       | 0.29      | 1.87       | 0.87       |
| 10                    | 1                           | 0.45     | 1.09     | 0.36     | 18.55    | 7.27     | 1.91      | 1.23      | 0.73      | 0.96       | 5.28      | 14.79      | 1.44      | 2.27       | 2.88       |
| 11                    | 1                           | 0.39     | 0.52     | 0.23     | 4.53     | 0.57     | 0.45      | 0.44      | 1.02      | 0.75       | 0.61      | 4.95       | 0.58      | 3.23       | 5.67       |
| 12                    | 1                           | 0.25     | 0.2      | 0.05     | 3.18     | 0.27     | 0.14      | 0.13      | 2.08      | 0.31       | 0.22      | 0.81       | 0.2       | 0.11       | 2.58       |
| 13                    | 1                           | 0.48     | 0.39     | 0.36     | 8.13     | 0.75     | 0.51      | 0.89      | 1.24      | 0.24       | 1.69      | 3.98       | 0.71      | 0.44       | 6.53       |
| 14                    | 1                           | 0.2      | 0.08     | 0.06     | 3.68     | 0.21     | 0.29      | 0.17      | 0.2       | 0.44       | 0.28      | 2.43       | 0.19      | 0.3        | 0.46       |
| 15                    | 1                           | 1.07     | 0.14     | 0.08     | 2.75     | 0.65     | 0.2       | 0.17      | 0.28      | 0.17       | 0.29      | 2.08       | 0.11      | 0.29       | 3.74       |
| 16                    | 1                           | 3.08     | 4.59     | 0.42     | 11.55    | 0.97     | 0.99      | 2.86      | 2.14      | 1.21       | 1.1       | 6.47       | 1.18      | 1.61       | 3.89       |
| 1                     | 0                           | 0.46     | 0.44     | 0.21     | 36.38    | 1.23     | 0.85      | 0.24      | 24.89     | 2.57       | 2.01      | 5.5        | 1.26      | 0.49       | 4.96       |
| 2                     | 0                           | 0.12     | 0.46     | 0.24     | 26.01    | 0.19     | 6.75      | 2.4       | 1.01      | 1.46       | 0.22      | 1.82       | 1.74      | 5.08       | 12.05      |
| 3                     | 0                           | 1.23     | 0.93     | 0.3      | 25.17    | 1.74     | 0.88      | 0.49      | 4.35      | 1.84       | 12.99     | 12.67      | 14.29     | 1.07       | 9.29       |
| 4                     | 0                           | 0.83     | 0.25     | 0.78     | 6.27     | 0.53     | 0.42      | 0.14      | 0.9       | 0.87       | 2.77      | 3.52       | 1.34      | 0.12       | 1.62       |
| 5                     | 0                           | 0.94     | 0.91     | 0.58     | 10.41    | 1.01     | 1.51      | 0.85      | 0.75      | 1.23       | 1.47      | 3.89       | 0.56      | 0.8        | 3.24       |
| 6                     | 0                           | 1.19     | 0.69     | 0.37     | 7.76     | 3.18     | 1.53      | 0.79      | 6.37      | 1.14       | 1.2       | 5.59       | 0.8       | 2.37       | 0.98       |
| 7                     | 0                           | 1.15     | 0.54     | 0.2      | 3.86     | 1.27     | 0.37      | 0.84      | 1.23      | 0.18       | 3.69      | 3.06       | 1.59      | 2.12       | 1.53       |
| 8                     | 0                           | 0.1      | 0.19     | 0.06     | 3.84     | 0.47     | 0.15      | 0.18      | 0.18      | 0.16       | 0.42      | 4.48       | 0.18      | 0.29       | 1.64       |
| 9                     | 0                           | 1.03     | 0.26     | 0.24     | 3.98     | 0.38     | 0.44      | 0.37      | 6.62      | 2.02       | 0.41      | 3.49       | 0.3       | 0.19       | 1.31       |
| 10                    | 0                           | 1.54     | 0.1      | 0.13     | 10.82    | 0.58     | 7.23      | 0.09      | 0.62      | 0.01       | 1.52      | 1.29       | 0.34      | 0.72       | 3.11       |
| 11                    | 0                           | 2.8      | 0.54     | 0.51     | 12.2     | 2.93     | 3.51      | 5.09      | 2.24      | 0.28       | 4.8       | 5.75       | 13.73     | 7.8        | 10.02      |
| 12                    | 0                           | 1.03     | 0.21     | 0.68     | 12.28    | 10.52    | 2.51      | 3.77      | 0.68      | 0.43       | 5.58      | 3.07       | 1.78      | 1.83       | 3.74       |
| 13                    | 0                           | 0.79     | 1.56     | 0.34     | 4.68     | 1.49     | 0.5       | 0.92      | 1.27      | 0.3        | 0.46      | 6.62       | 0.52      | 0.84       | 5.62       |
| 15                    | 0                           | 0.73     | 0.16     | 0.71     | 9.9      | 3.18     | 2         | 1.38      | 4.62      | 0.35       | 34.2      | 1.91       | 1.01      | 0.53       | 4.92       |
| 16                    | 0                           | 1.02     | 8.92     | 0.4      | 7.17     | 1.73     | 1.17      | 6.34      | 1.53      | 1.29       | 10.79     | 6.94       | 12.68     | 14.16      | 8.04       |
| 21                    | 0                           | 0.12     | 0.55     | 0.3      | 13.37    | 0.81     | 1.31      | 0.18      | 2.69      | 0.33       | 0.34      | 2.14       | 0.71      | 0.33       | 28.52      |
| 22                    | 0                           | 0.12     | 0.15     | 0.29     | 27.05    | 1.42     | 0.14      | 7.81      | 2.55      | 4.05       | 9.81      | 5.13       | 4.13      | 0.87       | 6.17       |
| 24                    | 0                           | 0.53     | 0.16     | 0.14     | 10.42    | 0.18     | 0.97      | 0.15      | 0.21      | 0.01       | 0.66      | 3.59       | 0.95      | 0.22       | 0.41       |
| 25                    | 0                           | 0.24     | 0.24     | 0.1      | 1.88     | 0.6      | 0.64      | 0.2       | 0.37      | 0.09       | 0.64      | 0.68       | 0.16      | 0.2        | 1.81       |
| 27                    | 0                           | 1.23     | 0.89     | 0.76     | 6.9      | 7.91     | 7.81      | 4.82      | 13.37     | 0.81       | 14.68     | 16.2       | 7.24      | 3.61       | 15.75      |
| 29                    | 0                           | 0.05     | 2.04     | 0.23     | 0.36     | 0.25     | 0.14      | 0.08      | 0.4       | 0.07       | 0.54      | 0.36       | 0.42      | 0.16       | 2.46       |
| 30                    | 0                           | 0.17     | 1.33     | 0.11     | 1.45     | 0.5      | 4.92      | 0.36      | 1.09      | 1.25       | 5         | 0.47       | 0.73      | 0.13       | 1.03       |
| 31                    | 0                           | 0.38     | 0.16     | 0.18     | 1.23     | 0.61     | 0.26      | 0.17      | 1.83      | 0.12       | 0.78      | 0.84       | 0.15      | 0.62       | 0.62       |
| 40                    | 0                           | 0.19     | 0.17     | 0.06     | 0.42     | 0.18     | 0.12      | 0.07      | 5.71      | 0.1        | 1.03      | 0.21       | 0.23      | 0.1        | 0.66       |
| 41                    | 0                           | 0.15     | 0.38     | 0.07     | 0.27     | 0.13     | 0.5       | 0.11      | 0.23      | 0.18       | 1.03      | 0.55       | 0.11      | 0.44       | 0.49       |
| 42                    | 0                           | 0.56     | 0.51     | 0.15     | 0.77     | 0.95     | 0.76      | 0.41      | 0.38      | 0.19       | 8.7       | 0.86       | 4.77      | 0.43       | 0.62       |
| 43                    | 0                           | 0.71     | 1.31     | 0.1      | 0.73     | 1.26     | 0.44      | 0.1       | 0.92      | 0.08       | 0.7       | 3.41       | 0.56      | 1.32       | 0.16       |

S1 Table. Dataset PPSV23 in Critically-ill

| Post ST 1 | Post ST 3 | Post ST 4 | Post ST 5 | Post ST 8 | Post ST 6B | Post ST 9N | Post ST 7F | Post ST |       | Post ST |       | Post ST |       | Post ST 18C | Post ST 1 | Fold increase Sero Type 1 | Fold increase Sero Type 3 |
|-----------|-----------|-----------|-----------|-----------|------------|------------|------------|---------|-------|---------|-------|---------|-------|-------------|-----------|---------------------------|---------------------------|
|           |           |           |           |           |            |            |            | 12F     | 103   | 1944    | 19F   | 5927    | 1298  |             |           |                           |                           |
| 1.34      | 2.27      | 7.31      | 9.9       | 12.44     | 20.02      | 7.7        | 3.27       | 1.03    | 19.44 | 59.27   | 12.98 | 18.35   | 47.5  | 11.17       | 12.61     |                           |                           |
| 0.83      | 1.56      | 0.71      | 31.33     | 4.26      | 4.6        | 2.22       | 28.27      | 2.31    | 48.2  | 1.5     | 0.77  | 9.06    | 39.78 | 7.55        | 2.03      |                           |                           |
| 6.61      | 5.97      | 2.87      | 42.77     | 19.13     | 37.83      | 3.48       | 5.45       | 1.03    | 48.2  | 23.07   | 13.54 | 18.35   | 8.98  | 2.39        | 7.65      |                           |                           |
| 5.51      | 0.69      | 1.77      | 24.51     | 9.67      | 5.09       | 6.68       | 1.43       | 0.72    | 1.85  | 3.45    | 6.65  | 18.35   | 9.51  | 7.87        | 1.23      |                           |                           |
| 0.99      | 18.13     | 8.18      | 8.91      | 19.13     | 36.42      | 9.71       | 6.04       | 23.65   | 30.21 | 59.27   | 28.74 | 18.35   | 42.03 | 2.75        | 5.51      |                           |                           |
| 1.48      | 2.47      | 0.34      | 21.17     | 4.56      | 6.65       | 0.61       | 28.27      | 0.91    | 4.62  | 18.6    | 10.94 | 1.38    | 30.12 | 7.4         | 1.36      |                           |                           |
| 0.68      | 1.24      | 3.11      | 42.77     | 18.34     | 0.72       | 0.15       | 9.59       | 1.11    | 1.42  | 12.48   | 3.24  | 1.3     | 24.82 | 4.86        | 13.78     |                           |                           |
| 32.71     | 8.82      | 11.97     | 5.43      | 8.22      | 35.31      | 1.31       | 28.27      | 7.62    | 48.2  | 41.65   | 35.53 | 18.35   | 44.29 | 38.03       | 16.04     |                           |                           |
| 2.5       | 0.84      | 0.99      | 9.51      | 4.5       | 7.98       | 4.88       | 7.83       | 1.08    | 50    | 16.36   | 23.48 | 17.88   | 9.88  | 35.71       | 8.4       |                           |                           |
| 28.56     | 3.08      | 7.61      | 50        | 9.94      | 14.06      | 9.6        | 4.13       | 50      | 50    | 31.66   | 26.2  | 16.2    | 28.99 | 63.47       | 2.83      |                           |                           |
| 23.15     | 1.48      | 2.26      | 8.2       | 16.48     | 0.64       | 2.13       | 3.39       | 1.16    | 37.94 | 7.37    | 7.97  | 17.77   | 12.51 | 59.36       | 2.85      |                           |                           |
| 28.03     | 1.28      | 1.13      | 14.6      | 15.4      | 2.18       | 2.01       | 50         | 0.68    | 16.4  | 2.38    | 2.53  | 1.08    | 36.94 | 112.12      | 6.4       |                           |                           |
| 8.37      | 5         | 9.54      | 30.38     | 50        | 3.17       | 23.44      | 18.62      | 1.11    | 50    | 57.6    | 33.33 | 17.29   | 50    | 17.44       | 12.82     |                           |                           |
| 8.74      | 8.41      | 0.66      | 17.57     | 2.35      | 5.77       | 2.75       | 2.27       | 50      | 3.21  | 21.91   | 4.22  | 1.93    | 5.55  | 43.7        | 105.13    |                           |                           |
| 21.67     | 1.7       | 2.5       | 5.47      | 8.42      | 12.01      | 1.07       | 3.98       | 1.02    | 3.74  | 5.11    | 2.08  | 50      | 50    | 20.25       | 12.14     |                           |                           |
| 4.78      | 13.26     | 8.76      | 15.6      | 4.09      | 9.88       | 2.02       | 23.77      | 50      | 18.21 | 21.24   | 24    | 16.72   | 35.53 | 1.55        | 2.89      |                           |                           |
| 1.35      | 0.69      | 0.19      | 17.08     | 11.14     | 1.06       | 0.23       | 28.27      | 2.5     | 48.2  | 11      | 18.51 | 18.35   | 46.55 | 2.93        | 1.57      |                           |                           |
| 10.12     | 1.09      | 8.09      | 30.79     | 0.38      | 6.97       | 23.87      | 1.71       | 1.39    | 1.98  | 7.92    | 33.49 | 18.35   | 40.41 | 84.33       | 2.37      |                           |                           |
| 1.2       | 1.03      | 0.46      | 21.71     | 4.04      | 0.83       | 0.56       | 4.32       | 1.76    | 12.32 | 16.12   | 16.69 | 1.12    | 10.55 | 0.98        | 1.11      |                           |                           |
| 3.08      | 0.47      | 6.21      | 9.87      | 2.08      | 1.25       | 0.29       | 2.8        | 1.08    | 48.2  | 59.27   | 24.52 | 0.21    | 4.4   | 3.71        | 1.88      |                           |                           |
| 7.69      | 1.46      | 11.97     | 36.27     | 6.33      | 37.83      | 13.75      | 7.1        | 23.65   | 3.47  | 9.94    | 4.79  | 17.69   | 45.36 | 8.18        | 1.6       |                           |                           |
| 1.43      | 0.69      | 0.36      | 5.42      | 5.84      | 3.83       | 1.4        | 4.27       | 1.09    | 1.06  | 4.07    | 1.83  | 1.64    | 2.23  | 1.2         | 1         |                           |                           |
| 16.17     | 5.92      | 3.47      | 31.38     | 19.13     | 16.44      | 23.87      | 28.27      | 13.92   | 48.2  | 40.92   | 15.28 | 14.49   | 47.5  | 14.06       | 10.96     |                           |                           |
| 0.55      | 0.25      | 0.09      | 4.56      | 16.61     | 0.65       | 1.87       | 0.6        | 0.33    | 10.36 | 17.3    | 5.47  | 0.86    | 9.77  | 5.5         | 1.32      |                           |                           |
| 0.77      | 0.19      | 0.19      | 2.95      | 0.31      | 0.37       | 0.29       | 4.06       | 2.26    | 0.32  | 2.71    | 0.23  | 0.16    | 1.07  | 0.75        | 0.73      |                           |                           |
| 1.52      | 0.16      | 0.18      | 12.85     | 0.62      | 6.55       | 0.16       | 1.71       | 0.14    | 1.38  | 1.64    | 0.48  | 0.67    | 3.39  | 0.99        | 1.6       |                           |                           |
| 2.32      | 0.68      | 0.62      | 15.99     | 2.87      | 3.11       | 6.15       | 2.71       | 0.3     | 8.22  | 5.73    | 16.37 | 8.4     | 9.84  | 0.83        | 1.26      |                           |                           |
| 1.19      | 0.41      | 0.61      | 14.57     | 6.8       | 3.55       | 3.86       | 0.67       | 0.61    | 7.87  | 3.22    | 2.05  | 2.64    | 5.59  | 1.16        | 1.95      |                           |                           |
| 33.02     | 18.13     | 0.64      | 23.12     | 19.13     | 4.04       | 23.87      | 17.47      | 1.96    | 16.7  | 19.72   | 8.07  | 13.85   | 37.19 | 41.8        | 11.62     |                           |                           |
| 0.71      | 0.19      | 0.49      | 6.89      | 19.13     | 2.33       | 1.66       | 4.06       | 0.76    | 33.57 | 1.79    | 1.55  | 0.35    | 4.56  | 0.97        | 1.19      |                           |                           |
| 24.44     | 13.63     | 1.66      | 29.62     | 8.43      | 18         | 23.87      | 24.03      | 4.66    | 45.64 | 32.95   | 16.49 | 13.44   | 37.51 | 23.96       | 1.53      |                           |                           |
| 3.79      | 1.26      | 0.3       | 23.08     | 1.4       | 1.1        | 1.71       | 3.09       | 1.57    | 0.22  | 1.96    | 1.01  | 0.31    | 26.4  | 31.58       | 2.29      |                           |                           |
| 0.12      | 0.12      | 0.27      | 21.84     | 1.33      | 0.12       | 8.38       | 2.37       | 3.41    | 9.25  | 4.08    | 3.92  | 0.85    | 5.58  | 1           | 0.8       |                           |                           |
| 19.14     | 0.76      | 0.69      | 42.77     | 3.75      | 8.23       | 0.84       | 15.14      | 1.34    | 3.46  | 15.08   | 14.24 | 2.91    | 6.64  | 36.11       | 4.75      |                           |                           |
| 1.53      | 0.56      | 0.68      | 10.69     | 1.41      | 2.26       | 2.25       | 5.5        | 1.46    | 7.15  | 3.59    | 1.3   | 2.14    | 6.88  | 6.38        | 2.33      |                           |                           |
| 1.67      | 3.99      | 1.04      | 10.32     | 6.33      | 10.14      | 5.88       | 17.79      | 1.49    | 20.49 | 16.76   | 13.49 | 5.27    | 18.5  | 1.36        | 4.48      |                           |                           |
| 3.67      | 18.13     | 7.73      | 0.5       | 5.83      | 1.11       | 1.97       | 0.61       | 0.11    | 8.01  | 7.78    | 10.15 | 2.65    | 17.9  | 73.4        | 8.89      |                           |                           |
| 4.08      | 1.66      | 0.59      | 5.81      | 1.31      | 1.67       | 1.28       | 12.13      | 3.41    | 8.37  | 2.24    | 35.53 | 4.92    | 2.45  | 24          | 1.25      |                           |                           |
| 3.69      | 0.77      | 0.35      | 1.23      | 6.63      | 1          | 0.34       | 1.09       | 0.71    | 1.31  | 28.75   | 6.64  | 1.56    | 2.72  | 9.71        | 4.81      |                           |                           |
| 1.49      | 1.1       | 0.49      | 4.75      | 1.1       | 0.23       | 0.74       | 9.22       | 0.66    | 2.15  | 0.64    | 1.12  | 0.41    | 2.39  | 7.84        | 6.47      |                           |                           |
| 4.29      | 4.56      | 1.87      | 8.94      | 4.37      | 25.52      | 1.86       | 4.71       | 1.55    | 16.5  | 27.94   | 1.71  | 5.77    | 4.6   | 28.6        | 12        |                           |                           |
| 0.3       | 0.31      | 0.05      | 0.2       | 0.53      | 0.21       | 0.11       | 0.12       | 0.07    | 4.06  | 0.27    | 2.4   | 0.1     | 0.18  | 0.54        | 0.61      |                           |                           |
| 14.46     | 2.4       | 0.31      | 3.68      | 1.21      | 4.43       | 1.75       | 4.34       | 1.38    | 10.31 | 12.39   | 3.33  | 4.18    | 7.25  | 20.366      | 1.8321    |                           |                           |

S1 Table. Dataset PPSV23 in Critically-ill

| Fold increase Sero Type 4 | Fold increase Sero Type 5 | Fold increase Sero Type 8 | Fold increase Sero Type 6B | Fold increase Sero Type 9N | Fold increase Sero Type 7F | Fold increase Sero Type 12F | Fold increase Sero Type 14 | Fold increase Sero Type 19F | Fold increase Sero Type 19V | Fold increase Sero Type 23F | Fold increase Sero Type 18C | Fold increase Sero Type 17.53 | Primary: combined responsiveness | >1mcg/mL serotype respons 14/14 | >1mcg/mL Serotype response 10/14 | >1mcg/mL Serotype response 8/14 |
|---------------------------|---------------------------|---------------------------|----------------------------|----------------------------|----------------------------|-----------------------------|----------------------------|-----------------------------|-----------------------------|-----------------------------|-----------------------------|-------------------------------|----------------------------------|---------------------------------|----------------------------------|---------------------------------|
| 28.12                     | 2.64                      | 37.7                      | 47.67                      | 36.67                      | 7.27                       | 2.29                        | 49.85                      | 19.37                       | 23.18                       | 152.92                      | 17.53                       | 17.53                         | 1                                | 1                               | 1                                | 1                               |
| 3.94                      | 3.98                      | 16.38                     | 4.89                       | 12.33                      | 2.21                       | 2.06                        | 15.21                      | 2.54                        | 4.28                        | 1.21                        | 8.43                        | 8.43                          | 1                                | 0                               | 1                                | 1                               |
| 7.18                      | 6.93                      | 22.77                     | 26.09                      | 12.89                      | 1.46                       | 1.23                        | 14.74                      | 5.03                        | 18.81                       | 21.09                       | 2.88                        | 2.88                          | 1                                | 1                               | 1                                | 1                               |
| 9.32                      | 9.18                      | 13.07                     | 12.12                      | 35.16                      | 1.54                       | 2.18                        | 4.2                        | 3.14                        | 7.15                        | 59.19                       | 3.73                        | 3.73                          | 1                                | 0                               | 1                                | 1                               |
| 22.72                     | 1.41                      | 23.33                     | 41.86                      | 7.65                       | 8.75                       | 17.39                       | 71.93                      | 7.27                        | 25.66                       | 29.6                        | 6.45                        | 6.45                          | 1                                | 0                               | 1                                | 1                               |
| 4.86                      | 1.21                      | 2.16                      | 10.08                      | 4.36                       | 24.37                      | 1.69                        | 12.16                      | 28.18                       | 8.75                        | 15.33                       | 11.91                       | 11.91                         | 0                                | 0                               | 1                                | 1                               |
| 10.03                     | 3.85                      | 0.99                      | 2.67                       | 1.67                       | 20.85                      | 1.16                        | 4.73                       | 5.2                         | 19.06                       | 26                          | 28.2                        | 28.2                          | 0                                | 0                               | 1                                | 1                               |
| 42.75                     | 0.92                      | 10.54                     | 30.44                      | 1.85                       | 14.35                      | 7.12                        | 65.14                      | 21.58                       | 32.3                        | 8.53                        | 5.29                        | 5.29                          | 1                                | 1                               | 1                                | 1                               |
| 24.75                     | 9.06                      | 12.16                     | 79.8                       | 54.22                      | 8.24                       | 7.71                        | 50                         | 2.69                        | 80.97                       | 9.56                        | 11.36                       | 11.36                         | 1                                | 0                               | 1                                | 1                               |
| 21.14                     | 50                        | 1.37                      | 7.36                       | 7.8                        | 5.66                       | 50                          | 50                         | 2.14                        | 18.19                       | 7.14                        | 10.07                       | 10.07                         | 1                                | 1                               | 1                                | 1                               |
| 9.83                      | 1.81                      | 28.91                     | 1.42                       | 4.84                       | 3.32                       | 1.55                        | 62.2                       | 1.49                        | 13.74                       | 5.5                         | 2.21                        | 2.21                          | 1                                | 0                               | 1                                | 1                               |
| 22.6                      | 4.59                      | 57.04                     | 15.57                      | 15.46                      | 50                         | 2.19                        | 74.55                      | 2.94                        | 12.65                       | 9.82                        | 14.32                       | 14.32                         | 1                                | 0                               | 1                                | 1                               |
| 26.5                      | 3.74                      | 50                        | 6.22                       | 26.34                      | 15.02                      | 4.63                        | 99                         | 14.47                       | 46.94                       | 39.3                        | 50                          | 50                            | 1                                | 1                               | 1                                | 1                               |
| 11                        | 4.77                      | 11.19                     | 19.9                       | 16.18                      | 11.35                      | 99                          | 11.46                      | 9.02                        | 22.21                       | 6.43                        | 12.07                       | 12.07                         | 1                                | 0                               | 1                                | 1                               |
| 31.25                     | 1.99                      | 12.95                     | 60.05                      | 6.29                       | 14.21                      | 6                           | 12.9                       | 2.46                        | 18.91                       | 50                          | 50                          | 50                            | 1                                | 1                               | 1                                | 1                               |
| 20.86                     | 1.35                      | 4.22                      | 9.98                       | 0.71                       | 11.11                      | 99                          | 16.55                      | 3.28                        | 20.34                       | 10.39                       | 9.13                        | 9.13                          | 1                                | 1                               | 1                                | 1                               |
| 0.9                       | 0.47                      | 9.06                      | 1.25                       | 0.96                       | 1.14                       | 0.97                        | 23.98                      | 2                           | 14.69                       | 37.45                       | 9.39                        | 9.39                          | 0                                | 0                               | 1                                | 1                               |
| 33.71                     | 1.18                      | 2                         | 1.03                       | 9.95                       | 1.69                       | 0.95                        | 9                          | 4.35                        | 19.25                       | 3.61                        | 3.35                        | 3.35                          | 1                                | 0                               | 1                                | 1                               |
| 1.53                      | 0.86                      | 2.32                      | 0.94                       | 1.14                       | 0.99                       | 0.96                        | 0.95                       | 1.27                        | 1.17                        | 1.05                        | 1.14                        | 1.14                          | 0                                | 0                               | 1                                | 1                               |
| 7.96                      | 1.57                      | 3.92                      | 2.98                       | 2.07                       | 3.11                       | 1.24                        | 17.4                       | 16.84                       | 18.3                        | 1.75                        | 2.72                        | 2.72                          | 0                                | 0                               | 1                                | 1                               |
| 20.64                     | 3.48                      | 6.27                      | 25.05                      | 16.18                      | 9.47                       | 19.23                       | 2.36                       | 2.56                        | 8.55                        | 22.11                       | 14                          | 14                            | 1                                | 1                               | 1                                | 1                               |
| 0.97                      | 0.7                       | 1.84                      | 2.5                        | 1.77                       | 0.67                       | 0.96                        | 0.88                       | 0.73                        | 2.29                        | 0.69                        | 2.28                        | 2.28                          | 0                                | 0                               | 1                                | 1                               |
| 17.35                     | 8.13                      | 15.06                     | 44.43                      | 28.42                      | 22.98                      | 77.33                       | 13.06                      | 13.37                       | 9.61                        | 6.83                        | 31.05                       | 31.05                         | 1                                | 1                               | 1                                | 1                               |
| 1.5                       | 1.19                      | 35.34                     | 4.33                       | 10.39                      | 3.33                       | 2.06                        | 24.67                      | 3.86                        | 30.39                       | 2.97                        | 5.96                        | 5.96                          | 0                                | 0                               | 0                                | 0                               |
| 0.79                      | 0.74                      | 0.82                      | 0.84                       | 0.78                       | 0.61                       | 1.12                        | 0.78                       | 0.78                        | 0.77                        | 0.84                        | 0.82                        | 0.82                          | 0                                | 0                               | 0                                | 0                               |
| 1.38                      | 1.19                      | 1.07                      | 0.91                       | 1.78                       | 2.76                       | 14                          | 0.91                       | 1.27                        | 1.41                        | 0.93                        | 1.09                        | 1.09                          | 0                                | 0                               | 0                                | 0                               |
| 1.22                      | 1.31                      | 0.98                      | 0.89                       | 1.21                       | 1.21                       | 1.07                        | 1.71                       | 1                           | 1.19                        | 1.08                        | 0.98                        | 0.98                          | 0                                | 0                               | 1                                | 1                               |
| 0.9                       | 1.19                      | 0.65                      | 1.41                       | 1.02                       | 0.99                       | 1.42                        | 1.41                       | 1.05                        | 1.15                        | 1.44                        | 1.49                        | 1.49                          | 0                                | 0                               | 1                                | 1                               |
| 1.88                      | 4.94                      | 12.84                     | 8.08                       | 25.95                      | 13.76                      | 6.53                        | 36.3                       | 2.98                        | 15.52                       | 16.49                       | 6.62                        | 6.62                          | 1                                | 0                               | 1                                | 1                               |
| 0.69                      | 0.7                       | 6.02                      | 1.17                       | 1.2                        | 0.88                       | 2.17                        | 0.98                       | 0.94                        | 1.53                        | 0.66                        | 0.93                        | 0.93                          | 0                                | 0                               | 0                                | 1                               |
| 4.15                      | 4.13                      | 4.87                      | 15.38                      | 3.76                       | 15.71                      | 3.61                        | 4.23                       | 4.75                        | 1.3                         | 0.95                        | 4.67                        | 4.67                          | 1                                | 1                               | 1                                | 1                               |
| 1                         | 1.73                      | 1.73                      | 0.84                       | 9.5                        | 1.15                       | 4.76                        | 0.65                       | 0.92                        | 1.42                        | 0.94                        | 0.93                        | 0.93                          | 0                                | 0                               | 1                                | 1                               |
| 0.93                      | 0.81                      | 0.94                      | 0.86                       | 1.07                       | 0.93                       | 0.84                        | 0.94                       | 0.8                         | 0.95                        | 0.98                        | 0.9                         | 0.9                           | 0                                | 0                               | 0                                | 1                               |
| 4.93                      | 4.1                       | 20.83                     | 8.48                       | 5.6                        | 72.1                       | 134                         | 5.24                       | 4.2                         | 14.99                       | 13.23                       | 16.2                        | 16.2                          | 1                                | 0                               | 1                                | 1                               |
| 6.8                       | 5.69                      | 2.35                      | 3.53                       | 11.25                      | 14.86                      | 16.22                       | 11.17                      | 5.28                        | 8.13                        | 10.7                        | 3.8                         | 3.8                           | 1                                | 0                               | 1                                | 1                               |
| 1.37                      | 1.5                       | 0.8                       | 1.3                        | 1.22                       | 1.33                       | 1.84                        | 1.4                        | 1.03                        | 1.86                        | 1.46                        | 1.17                        | 1.17                          | 0                                | 1                               | 1                                | 1                               |
| 33.61                     | 1.39                      | 23.32                     | 7.93                       | 24.63                      | 1.53                       | 1.57                        | 14.83                      | 21.61                       | 24.17                       | 16.56                       | 7.28                        | 7.28                          | 1                                | 0                               | 1                                | 1                               |
| 5.36                      | 4.01                      | 2.62                      | 0.34                       | 3.56                       | 11.13                      | 2.73                        | 1.67                       | 4.77                        | 48.67                       | 37.85                       | 2.38                        | 2.38                          | 1                                | 0                               | 1                                | 1                               |
| 1.94                      | 1                         | 10.87                     | 3.85                       | 2                          | 0.6                        | 5.92                        | 1.68                       | 34.23                       | 44.27                       | 2.52                        | 4.39                        | 4.39                          | 0                                | 0                               | 0                                | 1                               |
| 8.17                      | 11.31                     | 6.11                      | 1.92                       | 10.57                      | 1.61                       | 6.6                         | 2.09                       | 3.05                        | 4.87                        | 4.1                         | 3.62                        | 3.62                          | 0                                | 0                               | 0                                | 1                               |
| 26.71                     | 33.11                     | 33.62                     | 51.04                      | 16.91                      | 20.48                      | 8.61                        | 16.02                      | 50.8                        | 15.55                       | 13.11                       | 9.39                        | 9.39                          | 1                                | 1                               | 1                                | 1                               |
| 0.33                      | 0.26                      | 0.56                      | 0.28                       | 0.27                       | 0.32                       | 0.37                        | 0.47                       | 0.31                        | 0.5                         | 0.23                        | 0.29                        | 0.29                          | 0                                | 0                               | 0                                | 0                               |
| 3.1                       | 5.041                     | 0.96                      | 10.07                      | 17.5                       | 4.717                      | 17.25                       | 14.73                      | 3.633                       | 5.946                       | 3.1667                      | 45.3125                     | 45.3125                       | 1                                | 0                               | 1                                | 1                               |

S1 Table. Dataset PPSV23 in Critically-ill

| >1.3mcg/mL<br>Serotype<br>response<br>14/14 | >1.3mcg/mL<br>Serotype<br>response<br>10/14 | >1.3mcg/mL<br>Serotype<br>response<br>8/14 | >2 fold<br>response<br>14/14 | >2 fold<br>response<br>10/14 | >2 fold<br>response<br>8/14 | >4 fold<br>response<br>14/14 | >4 fold<br>response<br>10/14 | >4 fold<br>response<br>8/14 | Cortisol | CRP (mcg/dL · Percent<br>note units) | Burn  | Neuro Process<br>(Isch = 1, SDH =<br>2, ICH/IPH = 3,<br>SAH = 4) | Days from<br>admission to<br>vaccination |
|---------------------------------------------|---------------------------------------------|--------------------------------------------|------------------------------|------------------------------|-----------------------------|------------------------------|------------------------------|-----------------------------|----------|--------------------------------------|-------|------------------------------------------------------------------|------------------------------------------|
| 0                                           | 0                                           | 1                                          | 1                            | 1                            | 1                           | 1                            | 0                            | 1                           | 1        | 10.6                                 | 23.7  | 9                                                                | 3                                        |
| 0                                           | 0                                           | 1                                          | 1                            | 0                            | 1                           | 1                            | 0                            | 0                           | 0        | 21                                   | 5.1   | 20                                                               | 1                                        |
| 0                                           | 0                                           | 1                                          | 1                            | 0                            | 1                           | 1                            | 0                            | 1                           | 1        | 14                                   | 16    | 49                                                               | 2                                        |
| 0                                           | 0                                           | 1                                          | 1                            | 0                            | 1                           | 1                            | 0                            | 0                           | 1        | 21                                   | 13.6  | 20                                                               | 2                                        |
| 0                                           | 0                                           | 1                                          | 1                            | 0                            | 1                           | 1                            | 0                            | 1                           | 1        | 21                                   | 23.5  | 20                                                               | 2                                        |
| 0                                           | 0                                           | 1                                          | 1                            | 0                            | 1                           | 1                            | 0                            | 1                           | 1        | 4                                    | 15.7  | 15                                                               | 6                                        |
| 0                                           | 0                                           | 0                                          | 1                            | 0                            | 1                           | 1                            | 0                            | 0                           | 1        | 11                                   | 17.5  | 15                                                               | 2                                        |
| 1                                           | 1                                           | 1                                          | 1                            | 0                            | 1                           | 1                            | 0                            | 1                           | 1        | 13.7                                 | 7     | 54                                                               | 3                                        |
| 0                                           | 0                                           | 1                                          | 1                            | 1                            | 1                           | 1                            | 0                            | 1                           | 1        | 16.3                                 | 10.8  | 17                                                               | 7                                        |
| 1                                           | 1                                           | 1                                          | 1                            | 0                            | 1                           | 1                            | 0                            | 1                           | 1        | 24                                   | 5     | 19                                                               | 1                                        |
| 0                                           | 0                                           | 1                                          | 1                            | 0                            | 1                           | 1                            | 0                            | 0                           | 0        | 5                                    | 18.1  | 27                                                               | 2                                        |
| 0                                           | 0                                           | 1                                          | 1                            | 1                            | 1                           | 1                            | 0                            | 1                           | 1        | 7                                    | 28.8  | 19                                                               | 3                                        |
| 0                                           | 0                                           | 1                                          | 1                            | 1                            | 1                           | 1                            | 0                            | 1                           | 1        | 1                                    | 7.2   | 41                                                               | 2                                        |
| 0                                           | 0                                           | 1                                          | 1                            | 1                            | 1                           | 1                            | 1                            | 1                           | 1        | 13.2                                 | 25.6  | 15                                                               | 6                                        |
| 0                                           | 0                                           | 1                                          | 1                            | 0                            | 1                           | 1                            | 0                            | 1                           | 1        | 15                                   | 23.88 | 20                                                               | 3                                        |
| 1                                           | 1                                           | 1                                          | 1                            | 0                            | 1                           | 1                            | 0                            | 0                           | 1        | 22                                   | 17.6  | 23                                                               | 1                                        |
| 0                                           | 0                                           | 1                                          | 1                            | 0                            | 0                           | 0                            | 0                            | 0                           | 0        | 29                                   | 23.5  |                                                                  | 4                                        |
| 0                                           | 0                                           | 1                                          | 1                            | 0                            | 0                           | 1                            | 0                            | 0                           | 0        | 30                                   | 1.1   |                                                                  | 3                                        |
| 0                                           | 0                                           | 0                                          | 1                            | 0                            | 0                           | 0                            | 0                            | 0                           | 0        | 32                                   | 16.2  |                                                                  | 3                                        |
| 0                                           | 0                                           | 0                                          | 1                            | 0                            | 1                           | 1                            | 0                            | 0                           | 0        | 3                                    | 8     |                                                                  | 1                                        |
| 1                                           | 1                                           | 1                                          | 1                            | 0                            | 1                           | 1                            | 0                            | 1                           | 1        | 15                                   | 10.6  |                                                                  | 4                                        |
| 0                                           | 0                                           | 1                                          | 1                            | 0                            | 0                           | 0                            | 0                            | 0                           | 0        | 12                                   | 21.7  |                                                                  | 4                                        |
| 1                                           | 1                                           | 1                                          | 1                            | 1                            | 1                           | 1                            | 1                            | 1                           | 1        | 22                                   | 11.1  |                                                                  | 3                                        |
| 0                                           | 0                                           | 0                                          | 0                            | 0                            | 1                           | 1                            | 0                            | 0                           | 0        | 16                                   | 10    |                                                                  | 3                                        |
| 0                                           | 0                                           | 0                                          | 0                            | 0                            | 0                           | 0                            | 0                            | 0                           | 0        | 14.2                                 | 10.1  |                                                                  | 4                                        |
| 0                                           | 0                                           | 0                                          | 0                            | 0                            | 0                           | 0                            | 0                            | 0                           | 0        | 16                                   | 4.2   |                                                                  | 2                                        |
| 0                                           | 0                                           | 1                                          | 1                            | 0                            | 0                           | 0                            | 0                            | 0                           | 0        | 3                                    | 1.5   |                                                                  | 4                                        |
| 0                                           | 0                                           | 0                                          | 1                            | 0                            | 0                           | 0                            | 0                            | 0                           | 0        | 20                                   | 0.2   |                                                                  | 1                                        |
| 0                                           | 0                                           | 1                                          | 1                            | 0                            | 1                           | 1                            | 0                            | 1                           | 1        | 34                                   | 8.2   |                                                                  | 4                                        |
| 0                                           | 0                                           | 0                                          | 1                            | 0                            | 0                           | 0                            | 0                            | 0                           | 0        | 20                                   | 2.1   |                                                                  | 3                                        |
| 1                                           | 1                                           | 1                                          | 1                            | 0                            | 1                           | 1                            | 0                            | 0                           | 1        | 3                                    | 3.7   |                                                                  | 4                                        |
| 0                                           | 0                                           | 0                                          | 1                            | 0                            | 0                           | 0                            | 0                            | 0                           | 0        | 12                                   | 4.4   |                                                                  | 4                                        |
| 0                                           | 0                                           | 0                                          | 1                            | 0                            | 0                           | 0                            | 0                            | 0                           | 0        | 22                                   | 2.07  |                                                                  | 4                                        |
| 0                                           | 0                                           | 1                                          | 1                            | 1                            | 1                           | 1                            | 1                            | 1                           | 1        | 13                                   | 20.89 |                                                                  | 4                                        |
| 0                                           | 0                                           | 1                                          | 1                            | 1                            | 1                           | 1                            | 0                            | 1                           | 1        | 10                                   | 17.87 |                                                                  | 4                                        |
| 0                                           | 0                                           | 1                                          | 1                            | 0                            | 0                           | 0                            | 0                            | 0                           | 0        | 18.3                                 | 8.7   |                                                                  | 4                                        |
| 0                                           | 0                                           | 1                                          | 1                            | 0                            | 1                           | 1                            | 0                            | 1                           | 1        | 30                                   | 1.75  |                                                                  | 4                                        |
| 0                                           | 0                                           | 1                                          | 1                            | 0                            | 1                           | 1                            | 0                            | 0                           | 0        | 6                                    | 11.74 |                                                                  | 4                                        |
| 0                                           | 0                                           | 0                                          | 0                            | 0                            | 0                           | 1                            | 0                            | 0                           | 0        | 10                                   | 17.41 |                                                                  | 4                                        |
| 0                                           | 0                                           | 0                                          | 0                            | 0                            | 1                           | 1                            | 0                            | 0                           | 1        | 32                                   | 3.77  |                                                                  | 4                                        |
| 1                                           | 1                                           | 1                                          | 1                            | 1                            | 1                           | 1                            | 1                            | 1                           | 1        | 14                                   | 10.25 |                                                                  | 4                                        |
| 0                                           | 0                                           | 0                                          | 0                            | 0                            | 0                           | 0                            | 0                            | 0                           | 0        | 4                                    | 3.82  |                                                                  | 4                                        |
| 0                                           | 0                                           | 1                                          | 1                            | 0                            | 1                           | 1                            | 0                            | 0                           | 1        | 17                                   | 9.89  |                                                                  | 4                                        |

S1 Table. Dataset PPSV23 in Critically-ill

| Days between vaccine and f/u blood draw | Age | Hospital |         | Median fold increase across all serotypes | WBC pre (highest w/in 24 hours admission) | Absolute Lymphocytes (admission) | Absolute Lymphocytes (closest to PPSV23) | WBC 24 hr Post | Required Pressors (Y = 1) | Gender (F=1) | ALL Median post IgG | APACHE II | Use of steroids (Y = 1) |
|-----------------------------------------|-----|----------|---------|-------------------------------------------|-------------------------------------------|----------------------------------|------------------------------------------|----------------|---------------------------|--------------|---------------------|-----------|-------------------------|
|                                         |     | LOS      | ICU LOS |                                           |                                           |                                  |                                          |                |                           |              |                     |           |                         |
| 19                                      | 50  | 9        | 9       | 21.273926                                 | 9.7                                       | 2.4                              | 1.5                                      | 6.3            | 0                         | 0            | 11.17               | 4         | 0                       |
| 10                                      | 32  | 11       | 11      | 4.129359                                  | 16.1                                      | 2.5                              | 3.8                                      | 9.3            | 0                         | 0            | 3.285               | 13        | 0                       |
| 14                                      | 19  | 77       | 77      | 7.4144231                                 | 19.9                                      | 2                                | 0.5                                      | 1.5            | 1                         | 0            | 11.26               | 20        | 0                       |
| 14                                      | 35  | 30       | 30      | 7.5109831                                 | 18.3                                      | 5                                | 1.4                                      | 5.2            | 0                         | 0            | 5.3                 | 14        | 0                       |
| 14                                      | 33  | 17       | 17      | 13.071665                                 | 32.5                                      | 1                                | 1.2                                      | 12.9           | 0                         | 1            | 18.74               | 8         | 0                       |
| 14                                      | 47  | 22       | 18      | 8.076                                     | 15.5                                      | 1.6                              | 1.1                                      | 8.5            | 0                         | 1            | 4.59                | 5         | 0                       |
| 14                                      | 56  | 49       | 40      | 5.0285714                                 | 11.6                                      | 0.6                              | 1                                        | 6.4            | 1                         | 1            | 2.265               | 19        | 0                       |
| 14                                      | 56  | 270      | 270     | 15.193309                                 | 29.7                                      | 0.5                              | 0.3                                      | 5.1            | 1                         | 1            | 23.31               | 20        | 0                       |
| 14                                      | 40  | 30       | 25      | 11.759242                                 | 14.9                                      | 1.3                              | 2.4                                      | 32             | 0                         | 0            | 7.905               | 10        | 0                       |
| 14                                      | 26  | 17       | 12      | 8.9354251                                 | 13.3                                      | 0.8                              | 1.5                                      | 4.4            | 0                         | 0            | 19.925              | 7         | 0                       |
| 15                                      | 19  | 18       | 22      | 4.0822193                                 | 23.2                                      | 1.9                              | 1.9                                      | 3.5            | 0                         | 1            | 7.67                | 10        | 0                       |
| 10                                      | 36  | 20       | 7       | 14.889684                                 | 30.9                                      | 1.1                              | 1.1                                      | 18.9           | 0                         | 0            | 2.455               | 8         | 0                       |
| 15                                      | 49  | 29       | 25      | 21.887289                                 | 13.9                                      | 0.9                              | 0.9                                      | 3              | 0                         | 0            | 18.875              | 5         | 0                       |
| 14                                      | 53  | 26       | 25      | 11.764752                                 | 14.9                                      | 1.7                              | 1.4                                      | 11.4           | 0                         | 0            | 4.885               | 6         | 0                       |
| 14                                      | 45  | 31       | 26      | 13.584066                                 | 39.7                                      | 3.7                              | 1.5                                      | 14.1           | 1                         | 0            | 4.545               | 19        | 0                       |
| 13                                      | 45  | 30       | 29      | 9.556737                                  | 23.7                                      | 1.5                              | 1.3                                      | 6.6            | 1                         | 1            | 16.16               | 23        | 0                       |
| 14                                      | 36  | 50       | 48      | 1.78                                      | 20.2                                      | 2.2                              | 1                                        | 22.5           | 1                         | 1            | 11.07               | 26        | 0                       |
| 14                                      | 59  | 83       | 29      | 3.4828658                                 | 13                                        | 1.7                              | 1.7                                      | 16.1           | 1                         | 1            | 8.005               | 17        | 1                       |
| 14                                      | 75  | 33       | 21      | 1.0771279                                 | 12.8                                      | 1                                | 1.1                                      | 10.4           | 0                         | 0            | 2.9                 | 25        | 0                       |
| 15                                      | 31  | 91       | 13      | 3.0436508                                 | 16.7                                      | 0.9                              | 0.8                                      | 16.7           | 1                         | 0            | 2.94                | 23        | 0                       |
| 14                                      | 75  | 33       | 29      | 9.010119                                  | 9.3                                       | 0.3                              | 0.9                                      | 23.5           | 1                         | 0            | 10.955              | 14        | 0                       |
| 14                                      | 37  | 30       | 26      | 0.9864865                                 | 20.8                                      | 3.3                              | 0.9                                      | 17.8           | 1                         | 0            | 1.735               | 18        | 1                       |
| 14                                      | 44  | 50       | 37      | 14.561931                                 | 14.3                                      | 0.3                              | 1                                        | 13             | 0                         | 0            | 17.785              | 19        | 0                       |
| 14                                      | 52  | 41       | 26      | 4.0974702                                 | 11.3                                      | 0.5                              | 0.6                                      | 8.1            | 1                         | 0            | 1.365               | 3         | 0                       |
| 14                                      | 55  | 34       | 27      | 0.7821358                                 | 15.1                                      | 1.3                              | 1.3                                      | 14.8           | 1                         | 0            | 0.345               | 17        | 0                       |
| 15                                      | 56  | 49       | 49      | 1.2294667                                 | 16.1                                      | 1.4                              | 0.9                                      | 9.7            | 1                         | 0            | 1.025               | 26        | 0                       |
| 14                                      | 69  | 17       | 17      | 1.1346014                                 | 16                                        | 1.8                              | 2.4                                      | 18.3           | 0                         | 1            | 4.42                | 14        | 1                       |
| 14                                      | 82  | 22       | 2       | 1.1709109                                 | 8.7                                       | 1.7                              | 1.7                                      | 8.7            | 0                         | 0            | 2.93                | 15        | 0                       |
| 14                                      | 55  | 23       | 19      | 12.230361                                 | 16.1                                      | 1                                | 1.3                                      | 10.6           | 0                         | 1            | 17.8                | 10        | 0                       |
| 14                                      | 76  | 18       | 18      | 0.9770908                                 | 13                                        | 0.9                              | 2                                        | 9.2            | 1                         | 1            | 1.725               | 24        | 0                       |
| 14                                      | 53  | 20       | 19      | 4.1899212                                 | 11.2                                      | 1.5                              | 0.5                                      | 13.6           | 1                         | 1            | 20.935              | 11        | 1                       |
| 14                                      | 59  | 31       | 31      | 1.285617                                  | 14.8                                      | 1.3                              | 1.1                                      | 11.4           | 1                         | 1            | 1.485               | 15        | 0                       |
| 14                                      | 51  | 21       | 17      | 0.9302231                                 | 13.1                                      | 0.9                              | 1.8                                      | 7.6            | 1                         | 0            | 2.89                | 7         | 0                       |
| 14                                      | 50  | 27       | 18      | 10.855904                                 | 21.1                                      | 0.9                              | 0.9                                      | 11.4           | 1                         | 1            | 5.195               | 14        | 1                       |
| 14                                      | 66  | 22       | 21      | 6.5875                                    | 16.6                                      | 1.2                              | 0.9                                      | 11.2           | 1                         | 0            | 2.195               | 27        | 0                       |
| 14                                      | 43  | 56       | 57      | 1.3630723                                 | 14.1                                      | 1.2                              | 1.2                                      | 15.8           | 0                         | 0            | 8.235               | 18        | 0                       |
| 14                                      | 42  | 56       | 56      | 15.697917                                 | 14.1                                      | 1                                | 2                                        | 15.8           | 1                         | 0            | 4.75                | 27        | 0                       |
| 14                                      | 38  | 24       | 24      | 3.7812261                                 | 11.4                                      | 2.1                              | 1.3                                      | 12.6           | 1                         | 1            | 2.93                | 11        | 0                       |
| 14                                      | 58  | 24       | 24      | 4.1166253                                 | 13                                        | 0.8                              | 0.6                                      | 9.8            | 1                         | 0            | 1.27                | 20        | 0                       |
| 14                                      | 61  | 18       | 16      | 5.4903382                                 | 11.9                                      | 1.1                              | 1.6                                      | 6              | 0                         | 1            | 1.1                 | 8         | 0                       |
| 14                                      | 63  | 30       | 30      | 18.693676                                 | 11.3                                      | 1.2                              | 1.1                                      | 8.1            | 1                         | 1            | 4.58                | 20        | 0                       |
| 14                                      | 64  | 8        | 8       | 0.3245614                                 | 21.3                                      | 1.5                              | 2.3                                      | 19.4           | 1                         | 1            | 0.205               | 34        | 0                       |
| 14                                      | 42  | 14       | 14      | 5.4937622                                 | 16.6                                      | 2.3                              | 1                                        | 10.2           | 1                         | 1            | 3.93                | 17        | 1                       |

S1 Table. Dataset PPSV23 in Critically-ill

| Mechanical Ventilation (Yes = 1) | Hospital                            | Post hoc                 | Fold increase               |                                                             |                                                | NOTE 1= YES                                                                   | NOTE: 1 = YES                     | 1 = NO SAD,                        |
|----------------------------------|-------------------------------------|--------------------------|-----------------------------|-------------------------------------------------------------|------------------------------------------------|-------------------------------------------------------------------------------|-----------------------------------|------------------------------------|
|                                  | Mortality (Yes = 1, died this stay) | Change in WBC Pre - Post | yes/no outcomes to include: | Response in 5 of 7 PPSV23 only ST > 1.3mcg = 1, MOD SAD = 0 | >2 fold in 5 of 7 PPSV23 only = 1, failure = 0 | >1.3 and >2 fold increase in 5 Of 7 PPSV23 only = 1, Moderate or MILD SAD = 0 | response Moberley "OR" def (>50%) | response, Moberley "OR" def (>70%) |
| 0                                | 0                                   | 3.4                      |                             | 1                                                           | 1                                              | 1                                                                             | 1                                 | 1                                  |
| 1                                | 0                                   | 6.8                      |                             | 1                                                           | 1                                              | 1                                                                             | 1                                 | 1                                  |
| 1                                | 0                                   | 18.4                     |                             | 1                                                           | 1                                              | 1                                                                             | 1                                 | 1                                  |
| 1                                | 0                                   | 13.1                     |                             | 1                                                           | 1                                              | 1                                                                             | 1                                 | 1                                  |
| 1                                | 0                                   | 19.6                     |                             | 1                                                           | 1                                              | 1                                                                             | 1                                 | 1                                  |
| 0                                | 0                                   | 7                        |                             | 1                                                           | 0                                              | 0                                                                             | 1                                 | 1                                  |
| 1                                | 0                                   | 5.2                      |                             | 0                                                           | 0                                              | 0                                                                             | 1                                 | 0                                  |
| 1                                | 0                                   | 24.6                     |                             | 1                                                           | 1                                              | 1                                                                             | 1                                 | 1                                  |
| 1                                | 0                                   | -17.1                    |                             | 1                                                           | 1                                              | 1                                                                             | 1                                 | 1                                  |
| 0                                | 0                                   | 8.9                      |                             | 1                                                           | 1                                              | 1                                                                             | 1                                 | 1                                  |
| 0                                | 0                                   | 19.7                     |                             | 1                                                           | 1                                              | 1                                                                             | 1                                 | 1                                  |
| 0                                | 0                                   | 12                       |                             | 1                                                           | 1                                              | 1                                                                             | 1                                 | 1                                  |
| 0                                | 0                                   | 10.9                     |                             | 1                                                           | 1                                              | 1                                                                             | 1                                 | 1                                  |
| 1                                | 0                                   | 3.5                      |                             | 1                                                           | 1                                              | 1                                                                             | 1                                 | 1                                  |
| 1                                | 0                                   | 25.6                     |                             | 1                                                           | 1                                              | 1                                                                             | 1                                 | 1                                  |
| 1                                | 0                                   | 17.1                     |                             | 1                                                           | 0                                              | 0                                                                             | 1                                 | 1                                  |
| 1                                | 0                                   | -2.3                     |                             | 1                                                           | 0                                              | 0                                                                             | 1                                 | 0                                  |
| 1                                | 0                                   | -3.1                     |                             | 1                                                           | 0                                              | 0                                                                             | 1                                 | 0                                  |
| 1                                | 1                                   | 2.4                      |                             | 0                                                           | 0                                              | 0                                                                             | 0                                 | 0                                  |
| 1                                | 0                                   | 0                        |                             | 0                                                           | 0                                              | 0                                                                             | 1                                 | 0                                  |
| 1                                | 0                                   | -14.2                    |                             | 1                                                           | 1                                              | 1                                                                             | 1                                 | 1                                  |
| 1                                | 1                                   | 3                        |                             | 1                                                           | 0                                              | 0                                                                             | 0                                 | 0                                  |
| 1                                | 1                                   | 1.3                      |                             | 1                                                           | 1                                              | 1                                                                             | 1                                 | 1                                  |
| 1                                | 0                                   | 3.2                      |                             | 0                                                           | 1                                              | 0                                                                             | 0                                 | 0                                  |
| 0                                | 1                                   | 0.3                      |                             | 0                                                           | 0                                              | 0                                                                             | 0                                 | 0                                  |
| 1                                | 0                                   | 6.4                      |                             | 0                                                           | 0                                              | 0                                                                             | 0                                 | 0                                  |
| 1                                | 0                                   | -2.3                     |                             | 1                                                           | 0                                              | 0                                                                             | 0                                 | 0                                  |
| 0                                | 0                                   | 0                        |                             | 0                                                           | 0                                              | 0                                                                             | 0                                 | 0                                  |
| 0                                | 0                                   | 5.5                      |                             | 1                                                           | 1                                              | 1                                                                             | 1                                 | 1                                  |
| 1                                | 1                                   | 3.8                      |                             | 0                                                           | 0                                              | 0                                                                             | 0                                 | 0                                  |
| 0                                | 0                                   | -2.4                     |                             | 1                                                           | 1                                              | 1                                                                             | 1                                 | 1                                  |
| 1                                | 1                                   | 3.4                      |                             | 1                                                           | 0                                              | 0                                                                             | 0                                 | 0                                  |
| 0                                | 0                                   | 5.5                      |                             | 1                                                           | 0                                              | 0                                                                             | 0                                 | 0                                  |
| 1                                | 0                                   | 9.7                      |                             | 1                                                           | 1                                              | 1                                                                             | 1                                 | 1                                  |
| 1                                | 1                                   | 5.4                      |                             | 1                                                           | 1                                              | 1                                                                             | 1                                 | 1                                  |
| 1                                | 0                                   | -1.7                     |                             | 1                                                           | 0                                              | 0                                                                             | 1                                 | 1                                  |
| 1                                | 0                                   | -1.7                     |                             | 0                                                           | 0                                              | 0                                                                             | 1                                 | 1                                  |
| 1                                | 0                                   | -1.2                     |                             | 1                                                           | 1                                              | 1                                                                             | 1                                 | 1                                  |
| 1                                | 0                                   | 3.2                      |                             | 0                                                           | 0                                              | 0                                                                             | 0                                 | 0                                  |
| 0                                | 0                                   | 5.9                      |                             | 0                                                           | 1                                              | 0                                                                             | 1                                 | 0                                  |
| 1                                | 0                                   | 3.2                      |                             | 1                                                           | 1                                              | 1                                                                             | 1                                 | 1                                  |
| 1                                | 1                                   | 1.9                      |                             | 0                                                           | 0                                              | 0                                                                             | 0                                 | 0                                  |
| 1                                | 1                                   | 6.4                      |                             | 1                                                           | 1                                              | 1                                                                             | 1                                 | 1                                  |

S1 Table. Dataset PPSV23 in Critically-ill

Table B: Opsonic Indices

| Identifier | Pn 1 OI | Pn 3 OI | Pn 5 OI | Pn 6B OI | Pn 7F OI | Pn 14 OI | Pn 23F OI |
|------------|---------|---------|---------|----------|----------|----------|-----------|
| N13 POST   | 1657    | 1159    | 381     | 1817     | 30571    | 5254     | 2968      |
| N27 POST   | 13      | 1264    | 324     | 3020     | 1124     | 1599     | 1175      |
| N29 POST   | 161     | 907     | 13      | 1245     | 923      | 1402     | 421       |
| N40 POST   | 298     | 431     | 77      | 26302    | 76009    | 37826    | 4         |
| N13 PRE    | 4       | 55      | 4       | 136      | 361      | 610      | 18        |
| N40 PRE    | 11      | 28      | 27      | 12       | 888      | 833      | 4         |
| N41 PRE    | 11      | 91      | 4       | 329      | 643      | 1254     | 128       |
| N43 PRE    | 4       | 116     | 50      | 17       | 7245     | 481      | 376       |
| B13 POST   | 1292    | 391     | 313     | 901      | 11855    | 10491    | 1191      |
| B14 POST   | 1748    | 241     | 7109    | 3427     | 12779    | 24596    | 32242     |
| B2 POST    | 496     | 464     | 1046    | 6764     | 12358    | 11551    | 536       |
